# Supplementary material
Source: HighWire-hosted journal article supplement (https://cmaj.ca/highwire/filestream/59171/field_highwire_adjunct_files/0/unsanction-pattani-1-at.pdf)
Supplement: unsanction-pattani-1-at.pdf [file unsanction-pattani-1-at.pdf]

## Appendix 1: References

1. *Threats to public health*. Barton (ACT): Department of Immigration and Border Protection, Australian Government. Available: [www.immi.gov.au/allforms/health-requirements/threats-public-health.htm](http://www.immi.gov.au/allforms/health-requirements/threats-public-health.htm) (accessed 2014 Nov. 30).
2. *Canada's response to Ebola*. Ottawa: Government of Canada. Available: [www.healthycanadians.gc.ca/diseases-conditions-maladies-affections/disease-maladie/ebola/response-reponse/index-eng.php?id=response](http://www.healthycanadians.gc.ca/diseases-conditions-maladies-affections/disease-maladie/ebola/response-reponse/index-eng.php?id=response) (accessed 2014 Nov. 30).
3. Branswell H. WHO doesn't approve of Canada's Ebola visa ban. *Globe and Mail* [Toronto] 2014 Nov. 8. Available: [www.theglobeandmail.com/news/national/who-doesnt-approve-of-canadas-ebola-visa-ban/article21513746/](http://www.theglobeandmail.com/news/national/who-doesnt-approve-of-canadas-ebola-visa-ban/article21513746/) (accessed 2014 Dec. 4).
4. *Ebola response roadmap. Situation report: 26 November 2014*. Geneva: World Health Organization. Available: [http://apps.who.int/iris/bitstream/10665/144498/1/roadmapsitrepre\\_26Nov2014\\_eng.pdf?ua=1](http://apps.who.int/iris/bitstream/10665/144498/1/roadmapsitrepre_26Nov2014_eng.pdf?ua=1) (accessed 2014 Dec. 4).
5. *Frequently asked questions about the International Health Regulations (2005)*. Geneva: World Health Organization. Available: [www.who.int/ihr/about/FAQ2009.pdf](http://www.who.int/ihr/about/FAQ2009.pdf) (accessed 2014 Dec. 4).
6. *International Sanitary Regulations. World Health Organization Regulations No. 2*. [Technical Reports Series no. 41]. Geneva: World Health Organization; 1951. Available: [http://whqlibdoc.who.int/trs/WHO\\_TRS\\_41.pdf](http://whqlibdoc.who.int/trs/WHO_TRS_41.pdf) (accessed 2014 Dec. 4).
7. *International Health Regulations (2005)*. 2nd ed. Geneva: World Health Organization; 2005. Available: [www.who.int/ihr/publications/9789241596664/en/](http://www.who.int/ihr/publications/9789241596664/en/) (accessed 2014 Dec. 4).
8. *Travel restrictions, flight operations and screening*. International SOS. Available: [www.internationalsos.com/ebola/index.cfm?content\\_id=435](http://www.internationalsos.com/ebola/index.cfm?content_id=435) (accessed 2014 Nov. 30).
9. Bogoch II, Creatore MI, Cetron MS, et al. Assessment of the potential for international dissemination of Ebola virus via commercial air travel during the 2014 west African outbreak. *Lancet* 2014 Oct. 21. [Epub ahead of print]
10. WHO Ebola Response Team. Ebola virus disease in West Africa — the first 9 months of the epidemic and forward projections. *N Engl J Med* 2014;371:1481-95.
11. Boozary AS, Farmer P, Jha A. The Ebola outbreak, fragile health systems, and quality as a cure. *JAMA* 2014;312:1859-60.
12. Gostin LO, Sridhar D. Global health and the law. *N Engl J Med* 2014;370:1732-40.
13. McCloskey B, Dar O, Zumla A, et al. Emerging infectious diseases and pandemic potential: status quo and reducing risk of global spread. *Lancet Infect Dis* 2014;14:1001-10.
14. United Nations Development Programme. *Human Development Report 1994*. New York: Oxford University Press; 1994. Available: [http://hdr.undp.org/sites/default/files/reports/255/hdr\\_1994\\_en\\_complete\\_nostats.pdf](http://hdr.undp.org/sites/default/files/reports/255/hdr_1994_en_complete_nostats.pdf) (accessed 2014 Dec. 4).
15. Aldis W. Health security as a public health concept: a critical analysis. *Health Policy Plan* 2008;23:369-75.

16. Calain P. From the field side of the binoculars: a different view on global public health surveillance. *Health Policy Plan* 2007;22:13-20.
17. Wilson K, Tigerstrom Bv, McDougall C. Protecting global health security through the International Health Regulations: requirements and challenges. *CMAJ* 2008;179:44-8.
18. National Advisory Committee on SARS and Public Health. *Learning from SARS: renewal of public health in Canada*. Ottawa: Health Canada; 2003. Available: [www.phac-aspc.gc.ca/publicat/sars-sras/pdf/sars-e.pdf](http://www.phac-aspc.gc.ca/publicat/sars-sras/pdf/sars-e.pdf) (accessed 2014 Dec. 4).
19. Sturtevant JL, Anema A, Brownstein J. The new International Health Regulations: considerations for global public health surveillance. *Disaster Med Public Health Prep* 2007;1:117-21.
20. Gladstone R. Sierra Leone to eclipse Liberia in Ebola cases. *New York Times* 2014 Nov. 26. Available: [www.nytimes.com/2014/11/27/world/africa/sierra-leone-to-eclipse-liberia-in-ebola-cases.html?mabReward=RI%3A7&action=click&contentCollection=Africa&region=Footer&module=Recommendation&src=recg&pgtype=article](http://www.nytimes.com/2014/11/27/world/africa/sierra-leone-to-eclipse-liberia-in-ebola-cases.html?mabReward=RI%3A7&action=click&contentCollection=Africa&region=Footer&module=Recommendation&src=recg&pgtype=article) (accessed 2014 Dec. 4).
21. *Infectious disease movement in a borderless world (workshop summary)*. Washington (DC): Institute of Medicine of the National Academies; 2010. Available: [www.iom.edu/Reports/2010/Infectious-Disease-Movement-in-a-Borderless-World-Workshop-Summary.aspx](http://www.iom.edu/Reports/2010/Infectious-Disease-Movement-in-a-Borderless-World-Workshop-Summary.aspx) (accessed 2014 Dec. 4).
22. *Information to States Parties regarding determination of fulfilment of IHR Core Capacity requirements for 2012 and potential extensions*. Geneva: World Health Organization; 2012. Available: [http://whqlibdoc.who.int/hq/2012/WHO\\_HSE\\_GCR\\_2012.1\\_eng.pdf?ua=1](http://whqlibdoc.who.int/hq/2012/WHO_HSE_GCR_2012.1_eng.pdf?ua=1) (accessed 2014 Dec. 4).
23. Bhattacharya D. An exploration of conceptual and temporal fallacies in international health law and promotion of global public health preparedness. *J Law Med Ethics* 2007;35:588-98, 512.
